# Supplementary material for: Lighting up of carbon dots for copper(ii) detection using an aggregation-induced enhanced strategy
Source: Royal Society of Chemistry journal article supplement (doi:10.1039/d1an02147h), 2021-12-23
Supplement: d1an02147h1.pdf [file d1an02147h1.pdf]

## Electronic Supplementary Information (ESI)

*for*

### **Light-Up Carbon Dots for Copper (II) Detection by Aggregation-Induced Enhanced Strategy**

Long Chuan Zhang,<sup>a</sup> Yu Meng Yang,<sup>a</sup> Ling Liang,<sup>a</sup> Yong Jian Jiang,<sup>a</sup> Chun Mei Li,<sup>a</sup> Yuang Fang Li,<sup>b</sup> Lei Zhan,<sup>a</sup> Hong Yan Zou<sup>a,\*</sup> and Cheng Zhi Huang<sup>a, b\*</sup>

<sup>a</sup> Key Laboratory of Luminescence Analysis and Molecular Sensing (Southwest University), Ministry of Education, College of Pharmaceutical Sciences, Southwest University, Chongqing 400715, P.R. China.

<sup>b</sup> Key Laboratory of Luminescence and Real-Time Analytical System, Chongqing Science and Technology Bureau, College of Chemistry and Chemical Engineering, Southwest University, Chongqing 400715, P.R. China.

†Corresponding Author: zhy2013@swu.edu.cn; chengzhi@swu.edu.cn; Fax: +86 2368367257; Tel: +86 2368254059

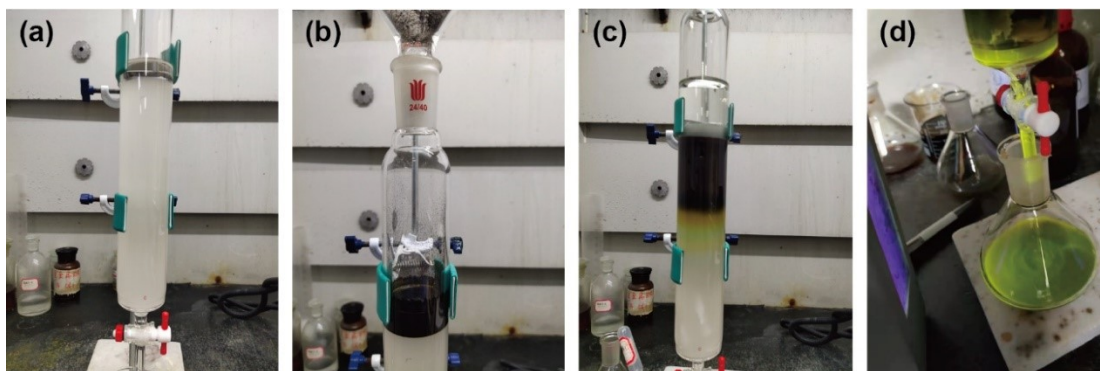

**Figure S1.** (a) Wet column loading. (b) Dry loading. (c) Gradient elution. (d) Collecting yellow components under the indication of 365 nm UV lamp (O-CDs appear yellow in the eluent, in yellow-orange appears in the aqueous solution).

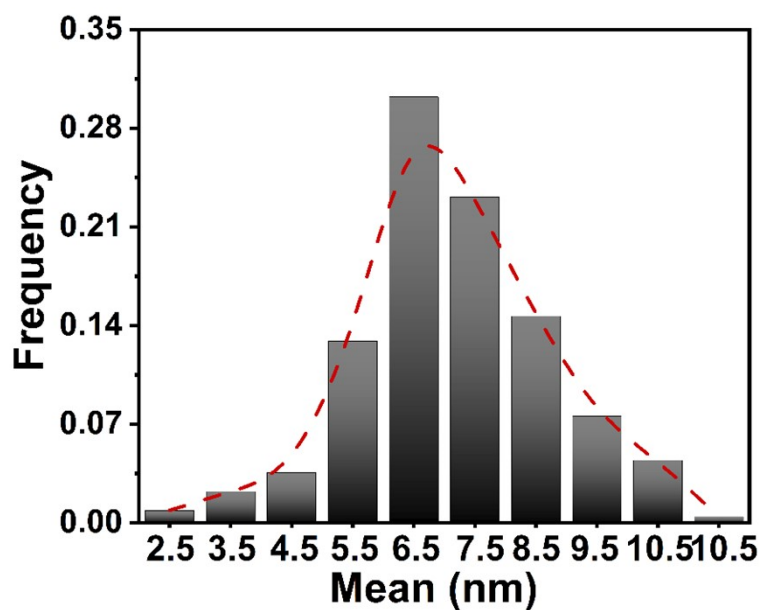

**Figure S2.** Histogram of the particle size distribution of O-CDs (The results of 225 O-CDs were tallied).

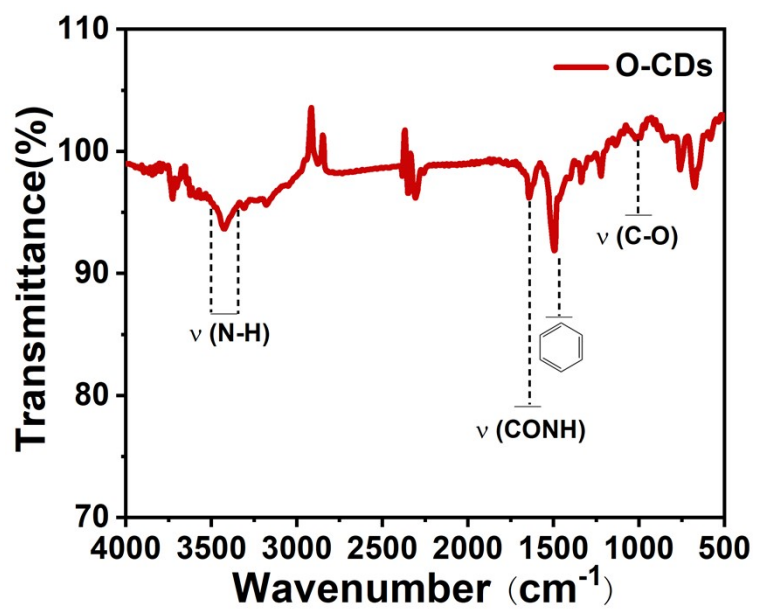

**Figure S3.** Fourier infrared spectroscopy of O-CDs.

The precursors iron phthalocyanine and O-phenylenediamine were put separately into two Teflon-lined autoclaves under the same condition as the O-CDs preparation. Then, we also used the same column chromatography method to purify product 1 (FePc-CDs) from iron phthalocyanine and product 2 (OPD-CDs) from O-phenylenediamine by column chromatography. Their optical properties were firstly compared.

As shown in Figure S2a, b the maximum emission wavelengths of FePc-CDs, OPD-CDs and O-CDs are 422 nm, 565 nm and 572 nm, respectively. We can see that the solution of FePc-CDs was blue, OPD-CDs were yellow and O-CDs were yellow-orange under 365 nm ultraviolet light. Based on this, we can conclude that the doping of iron phthalocyanine can make the wavelength of the carbon dots prepared from O-phenylenediamine red-shifted. O-CDs with longer wavelength emission and higher quantum yield are more conducive to imaging and colorimetry in subsequent analysis and detection.

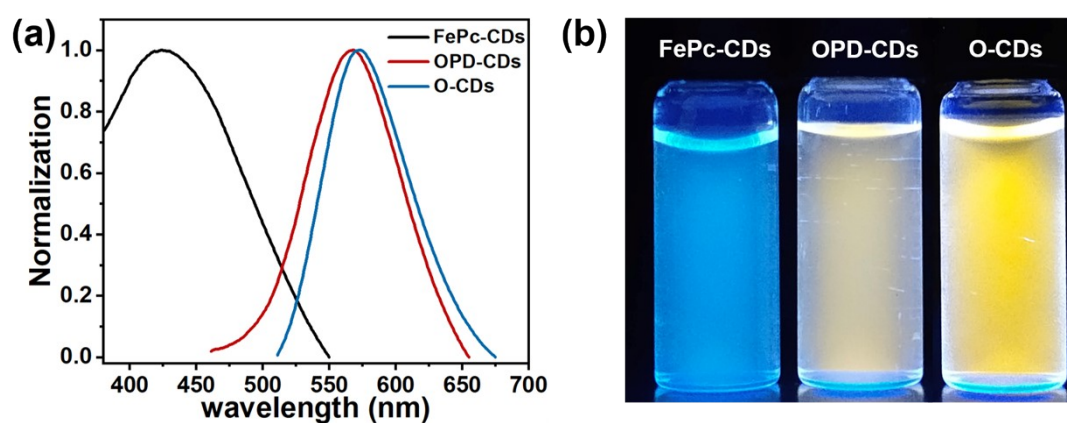

**Figure S4.** (a) Fluorescence spectra and (b) pictures under 365nm UV lamp of FePc-CDs, OPD-CDs and O-CDs.

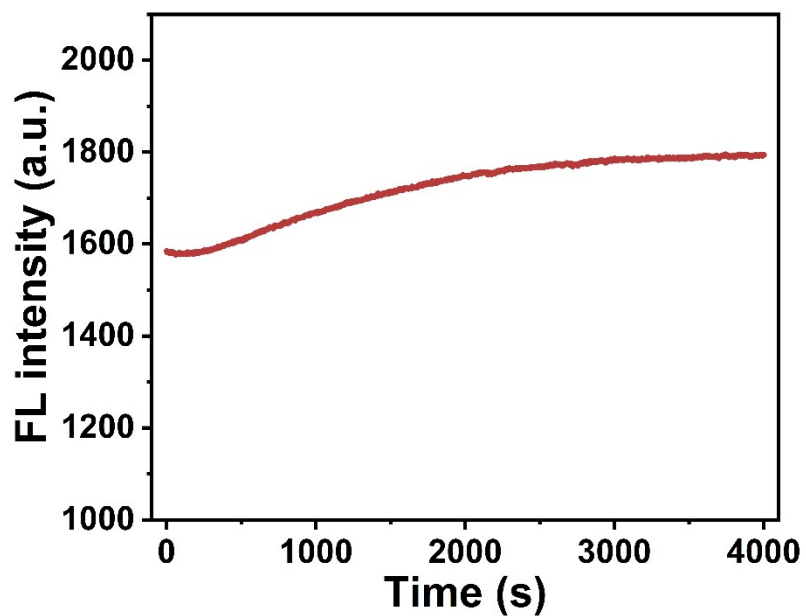

**Figure S5.** The fluorescence intensity of 4000 s was irradiated by carbon dots under 430 nm excitation light.

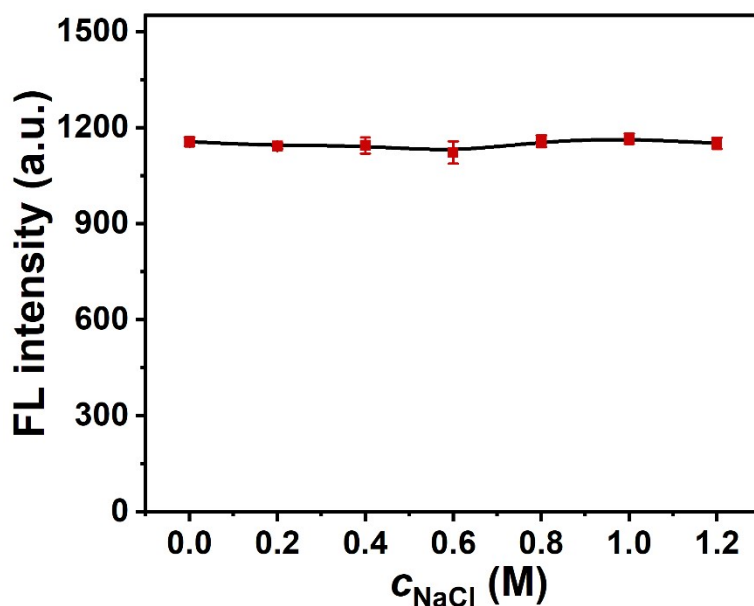

**Figure S6.** .....s of NaCl (0–1.2 M).

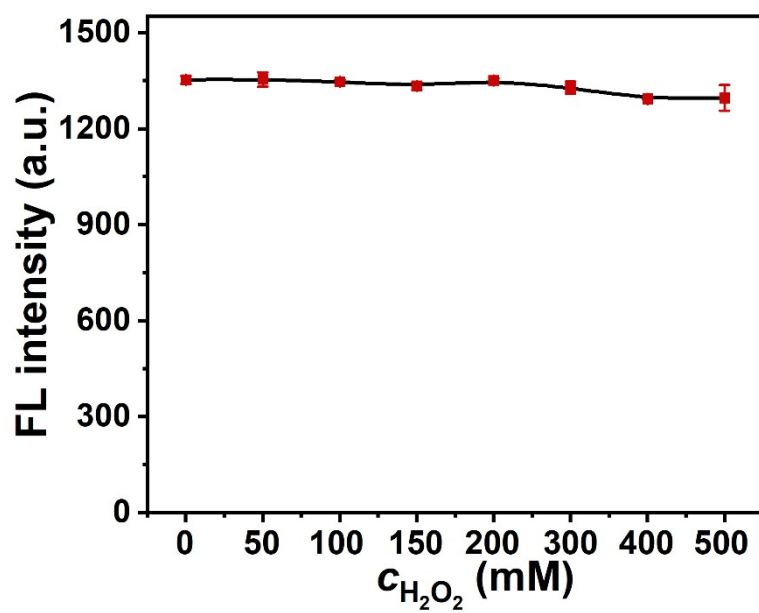

**Figure S7.** Fluorescence intensity of O-CDs at different concentrations of  $\text{H}_2\text{O}_2$  (0–500 mM).

CCK-8 assay was carried out to investigate the cytotoxicity of O-CDs. MCF-7 cells were seeded in 96-well plates at a seeding density of  $1.0 \times 10^5$  cells/well in 100  $\mu\text{L}$  DEME culture medium supplemented with 2% FBS and incubated at  $37^\circ\text{C}$  with 5%  $\text{CO}_2$  for 24 h. After rinsing with PBS, culture media containing serial concentrations of DNA-GO nano complex probes were incubated with MCF-7 cells for another 24 h. After PBS washing, each well was replaced by 10  $\mu\text{L}$  of Cell Counting Kit-8 (CCK-8) solution and 90  $\mu\text{L}$  of FBS free DEME, followed by incubation for 30 min. The optical densities (OD) of the mixture at a wavelength of 450 nm were measured with a Microplate Reader Model. The cell viability was estimated according to the following equation:

$$V_{cell} = \frac{OD_{Treated} - OD_{PBS}}{OD_{Control} - OD_{PBS}} \times 100\%$$

Where  $V_{cell}$  represents the cell viability (%),  $OD_{Treated}$  is the optical density in the presence of O-CDs,  $OD_{PBS}$  is the absorbance of PBS in the 96 well-plate and  $OD_{Control}$  is the optical density in the absence of O-CDs.

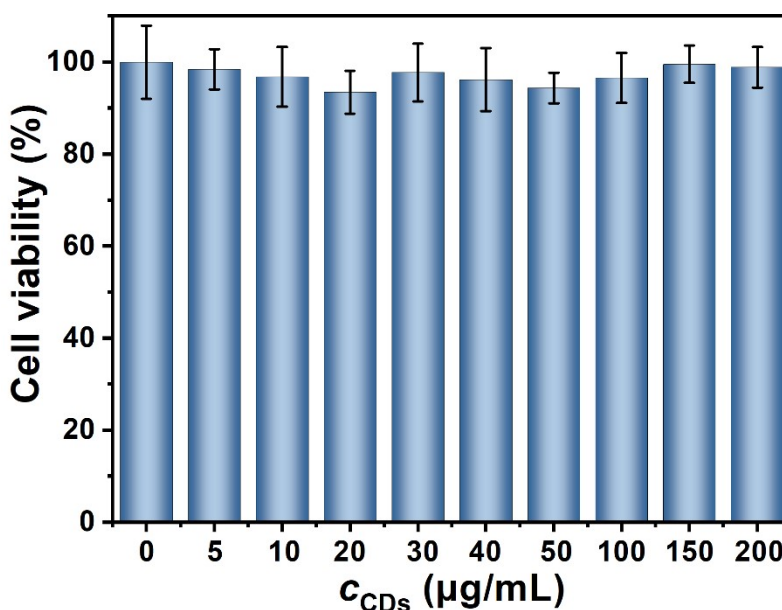

**Figure S8.** The relative survival rate of MCF-7 cells incubated with O-CDs for 24 h (n=3).

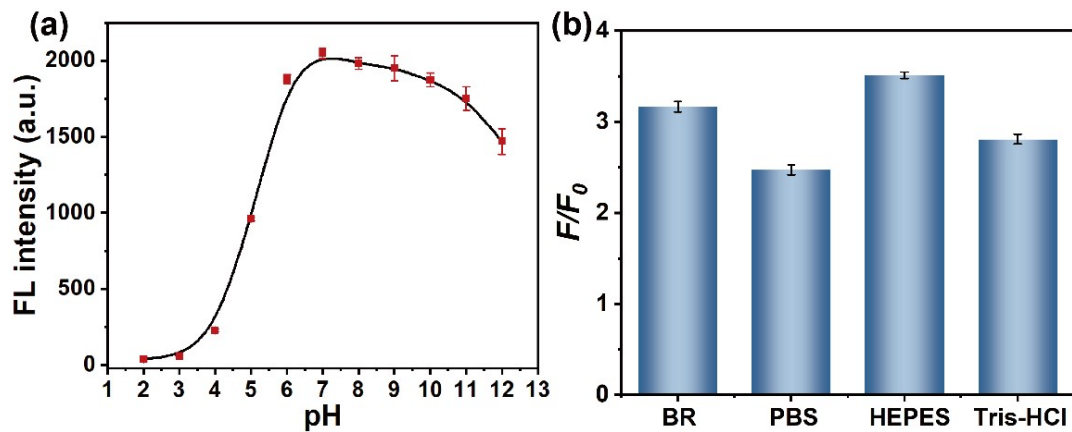

**Figure S9.** (a) pH stability of O-CDs. (b) Response of O-CDs in different buffer systems (pH 7.4).

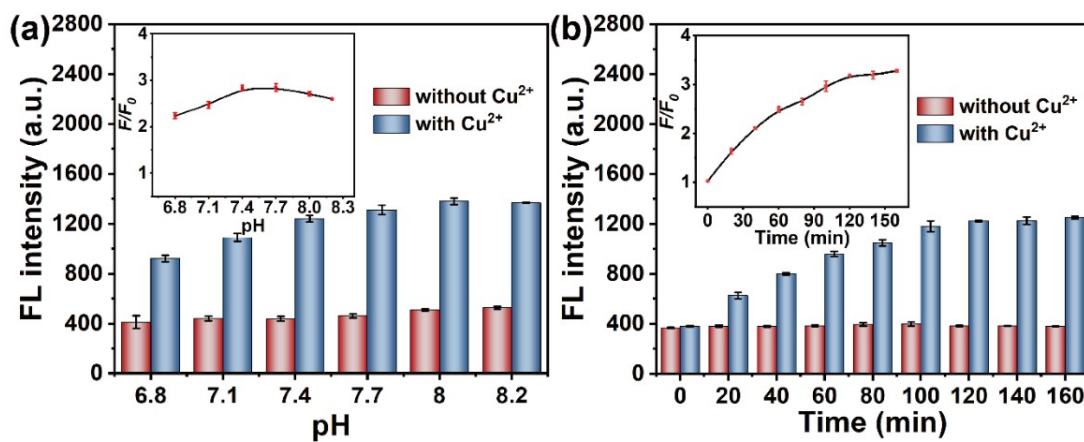

**Figure S10.** Optimization of detection conditions. (a) Optimization of reaction pH and (b) optimization of reaction time for the established detection method.



**Table S1. Comparison of various analytical technologies for Cu<sup>2+</sup>.**

| Materials        | Test Method              | Linear range | LOD      | Reference |
|------------------|--------------------------|--------------|----------|-----------|
| Modified AuNNP   | Photoacoustic imaging    | 0–18 mM      | 57.4 μM  | 1         |
| Organic molecule | Fluorescence quenching   | 0.0–10.0 μM  | 8.33 nM  | 2         |
| Organic molecule | Fluorescence enhancement | 0.0–10.0 μM  | 27.7 nM  | 3         |
| MGQD             | Fluorescence quenching   | 0.5–25 μM    | 0.5 μM   | 4         |
| Fluorescence     | Fluorescence quenching   | 0.05–5 μM    | 0.025 μM | 5         |
| O-CDs            | Fluorescence enhancement | 0.02–30 μM   | 14 nM    | this work |

### Reference

- (1) Feng, H.; Fu, Q.; Du, W.; Zhu, R.; Ge, X.; Wang, C.; Li, Q.; Su, L.; Yang, H.; Song, J. Quantitative Assessment of Copper(II) in Wilson's Disease Based on Photoacoustic Imaging and Ratiometric Surface-Enhanced Raman Scattering. *ACS Nano* 2021, **15**, 3402–3414.
- (2) Zhang, D.; Wang, Z.; Yang, J.; Yi, L.; Liao, L.; Xiao, X. Development of a method for the detection of Cu(2+) in the environment and live cells using a synthesized spider web-like fluorescent probe. *Biosens Bioelectron* 2021, **182**, 113174.
- (3) Chang, Y.; Li, B.; Mei, H.; Yang, L.; Xu, K.; Pang, X. Indole-based colorimetric/fluorimetric probe for selective detection of Cu(2+) and application in living cell imaging. *Spectrochim Acta A Mol Biomol Spectrosc* 2020, **226**, 117631.
- (4) Yeh, P.-C.; Yoon, S.; Kurniawan, D.; Chung, Y. G.; Chiang, W.-H. Unraveling the Fluorescence Quenching of Colloidal Graphene Quantum Dots for Selective Metal Ion Detection. *ACS Applied Nano Materials* 2021, **4**, 5636–5642.
- (5) Ge, J.; Shen, Y.; Wang, W.; Li, Y.; Yang, Y. N-doped carbon dots for highly sensitive and selective sensing of copper ion and sulfide anion in lake water. *Journal of Environmental Chemical Engineering* 2021, **9**, 2213-3437.
